# Supplementary material for: Interaction of soil pH, organic matter, exchangeable acidity, and cation exchange capacity in a managed tea farm
Source: PeerJ. 2025 Nov 24;13:e20341. doi: 10.7717/peerj.20341 (PMC12659706; doi:10.7717/peerj.20341)
Supplement: Supplemental Information 11 [file peerj-13-20341-s011.xlsx]

## Sheet: Sheet1
Sample number	pH	SOM（%）	Exchangeable hydrogen（cmol/kg)	Exchangeable aluminum（cmol/kg)	CEC
YACCBT1	4.3	11.2286	0.29	6.59	0.192515
YACCBT1-1	4.32	10.8042	0.27	6.57	0.18958
YACCBT1-2	4.31	10.6614	0.235	6.14	0.191928
YACCBT2	4.52	3.86352	0.18	6.335	0.227731
YACCBT2-1	4.51	4.04959	0.195	6.62	0.227731
YACCBT2-2	4.48	4.18512	0.19	6.435	0.23
YACCBT3	5.06	5.9835	0.14	2.985	0.233013
YACCBT3-1	5	5.33283	0.135	2.79	0.233013
YACCBT3-2	5.02	5.81622	0.1	2.775	0.235361
YACCBT4	4.55	4.05595	0.19	5.595	0.183124
YACCBT4-1	4.55	4.29829	0.205	5.485	0.185471
YACCBT4-2	4.53	4.20122	0.2	5.48	0.185471
YACCBT5	4.43	5.15904	0.325	8.8	0.287598
YACCBT5-1	4.42	5.29264	0.35	8.96	0.284664
YACCBT5-2	4.4	5.04449	0.36	8.98	0.284664
YACCBT6	4.57	4.40621	0.175	6.275	0.026999
YACCBT6-1	4.57	5.11545	0.18	6.405	0.0293468
YACCBT6-2	4.56	4.47787	0.19	6.41	0.0322814
YACCBT7	4.26	3.63177	0.175	6.01	0.114452
YACCBT7-1	4.26	3.59078	0.17	5.805	0.1168
YACCBT7-2	4.26	3.62633	0.165	5.81	0.119148
YACCBT8	4.39	6.92185	0.46	7.07	0.302272
YACCBT8-1	4.34	7.83948	0.46	6.91	0.299337
YACCBT8-2	4.34	6.74005	0.45	6.625	0.299337
YACCBT9	4.14	9.10249	0.38	7.905	0.349226
YACCBT9-1	4.11	8.63766	0.475	8.3	0.352748
YACCBT9-2	4.15	9.4633	0.475	8.16	0.349813
YACCBT10	4.31	7.45028	0.67	9.4	0.267055
YACCBT10-1	4.32	8.05825	0.625	9.35	0.266469
YACCBT10-2	4.3	7.79669	0.575	9.21	0.269403
YACCBT11	4.18	4.5773	0.275	5.9	0.190167
YACCBT11-1	4.17	4.65421	0.275	6.25	0.192515
YACCBT11-2	4.17	4.97115	0.225	6.35	0.192515
YACCBT12	5.82	6.06286	0.025	0.075	0.505351
YACCBT12-1	5.83	5.62163	0.05	0.1	0.508286
YACCBT12-2	5.91	5.81382	0.02	0.09	0.505351
YACCBT13	4.24	4.43771	0.26	6.77	0.178428
YACCBT13-1	4.26	5.17637	0.225	6.96	0.178428
YACCBT13-2	4.25	4.5937	0.27	6.705	0.178428
YACCBT14	4.85	5.33314	0.135	4.345	0.203666
YACCBT14-1	4.86	5.45997	0.125	4.425	0.206601
YACCBT14-2	4.85	5.43185	0.16	4.395	0.206601
YACCBT15	4.76	5.13793	0.23	4.445	0.165516
YACCBT15-1	4.73	4.72526	0.175	5.125	0.165516
YACCBT15-2	4.76	5.44503	0.16	4.965	0.165516
YACCBT16	4.46	5.75554	0.425	7	0.139691
YACCBT16-1	4.49	5.65502	0.43	7.06	0.139691
YACCBT16-2	4.51	5.18634	0.47	7.75	0.139691
YACCBT17	4.08	6.96701	0.135	4	0.236535
YACCBT17-1	4.08	6.61004	0.22	3.57	0.23947
YACCBT17-2	4.07	6.8749	0.26	4.56	0.23947
YACCBT18	3.95	7.07054	0.36	7.375	0.302859
YACCBT18-1	3.92	7.83948	0.375	8.41	0.302859
YACCBT18-2	3.92	6.74005	0.385	8.035	0.302859
YACCBT19	4.41	6.28819	0.26	6.815	0.259425
YACCBT19-1	4.43	6.4946	0.275	7.685	0.26236
YACCBT19-2	4.36	6.17346	0.305	6.445	0.262947
YACCBT20	4.48	4.55723	0.3	7.81	0.26999
YACCBT20-1	4.48	4.9036	0.25	7.71	0.26999
YACCBT20-2	4.5	4.66132	0.245	7.655	0.26999
YACCBT21	4.48	4.72073	0.41	7.79	0.152016
YACCBT21-1	4.49	4.60799	0.405	7.93	0.152016
YACCBT21-2	4.49	4.78447	0.36	7.68	0.151429
YACCBT22	4.4	6.05597	0.38	7.45	0.246513
YACCBT22-1	4.21	5.63968	0.41	7.55	0.244165
YACCBT22-2	4.22	5.93912	0.4	7.545	0.244165
YACCBT23	5.92	4.26693	0.06	0.105	0.334553
YACCBT23-1	5.84	3.76534	0.04	0.115	0.334553
YACCBT23-2	5.88	4.18567	0.06	0.115	0.334553
YACCBT24	4.21	6.51101	0.58	8.425	0.212471
YACCBT24-1	4.2	7.04605	0.56	8.29	0.212471
YACCBT24-2	4.2	6.01424	0.7	9.05	0.215405
YACCBT25	4.56	6.30367	0.25	6.76	0.080997
YACCBT25-1	4.57	6.33935	0.31	6.04	0.0833448
YACCBT25-2	4.6	5.90415	0.335	7.195	0.0833448
YACCBT26	4.46	4.89216	0.26	6.315	0.0780624
YACCBT26-1	4.47	4.31715	0.35	7.075	0.0804101
YACCBT26-2	4.49	5.34143	0.415	7.09	0.0804101
YACCBT27	4.07	4.0054	0.21	6.33	0.237709
YACCBT27-1	4.07	3.77563	0.25	5.875	0.237709
YACCBT27-2	4.07	4.01287	0.21	6.59	0.235361
YACCBT28	4.38	4.40531	0.53	8.045	0.156712
YACCBT28-1	4.34	4.05845	0.5	7.505	0.159059
YACCBT28-2	4.34	4.83188	0.45	7.515	0.159059
YACCBT29	6.86	3.67444	0.04	0.045	0.722517
YACCBT29-1	7.14	4.04907	0.035	0.05	0.722517
YACCBT29-2	7.27	3.81067	0.045	0.025	0.722517
YACCBT30	4.47	6.72955	0.505	8.47	0.272925
YACCBT30-1	4.45	6.84105	0.55	8.19	0.272925
YACCBT30-2	4.42	7.52958	0.55	7.795	0.272925
YACCPM4-1	4.26	3.14442	0.215	5.08	0.173733
YACCPM4-1-1	4.26	3.26766	0.3	4.94	0.170798
YACCPM4-1-2	4.26	2.92138	0.205	4.975	0.170798
YACCPM4-2	4.32	1.35079	0.25	4.695	0.0950835
YACCPM4-2-1	4.31	1.28304	0.14	4.955	0.0980182
YACCPM4-2-2	4.34	1.27027	0.19	4.755	0.0980182
YACCPM4-3	4.49	0.966779	0.19	4.65	0.0757146
YACCPM4-3-1	4.48	0.74999	0.18	4.66	0.0757146
YACCPM4-3-2	4.47	0.83726	0.205	4.695	0.0751277
YACCPM4-4	4.95	0.560198	0.155	3.915	0.133821
YACCPM4-4-1	4.9	0.567723	0.1	4.23	0.130887
YACCPM4-4-2	4.88	0.638621	0.125	3.965	0.130887
YACCPM4-5	4.86	0.682975	0.14	2	0.232426
YACCPM4-5-1	4.87	0.760548	0.15	2.13	0.229492
YACCPM4-5-2	4.85	0.820406	0.135	2.185	0.229492
YACCPM4-6	4.78	0.299012	0.325	1.14	0.179602
YACCPM4-6-1	4.77	0.389967	0.315	1.225	0.176667
YACCPM4-6-2	4.75	0.273582	0.34	1.255	0.176667
YACCPM4-7	5.14	0.663304	0.445	0.905	0.284664
YACCPM4-7-1	5.18	0.617619	0.39	0.9	0.28525
YACCPM4-7-2	5.17	0.832198	0.545	0.52	0.28525
YACCPM5-1	4.49	1.3126	0.14	4.18	0.140864
YACCPM5-1-1	4.48	1.29463	0.125	4.19	0.140864
YACCPM5-1-2	4.45	1.40536	0.125	4.26	0.143212
YACCPM5-2	4.94	0.761868	0.215	1.175	0.144973
YACCPM5-2-1	4.92	0.758516	0.245	1.42	0.142038
YACCPM5-2-2	4.97	0.663576	0.185	1.505	0.142038
YACCPM5-3	4.74	1.28602	0.24	3.1	0.167277
YACCPM5-3-1	4.72	1.14145	0.19	3.405	0.167277
YACCPM5-3-2	4.76	1.17052	0.13	3.3	0.167277
YACCPM5-4	4.81	0.885959	0.195	2.67	0.15319
YACCPM5-4-1	4.8	0.954699	0.25	2.645	0.15319
YACCPM5-4-2	4.83	0.924212	0.17	2.83	0.150255
YACCPM5-5	4.71	0.947862	0.32	3.13	0.190754
YACCPM5-5-1	4.72	0.762241	0.25	3.13	0.191341
YACCPM5-5-2	4.72	0.824985	0.205	3.355	0.191341
YACCPM5-6	5.1	0.660139	0.16	2.06	0.0311076
YACCPM5-6-1	5.13	0.442243	0.185	1.945	0.0287598
YACCPM5-6-2	5.05	0.47592	0.19	1.945	0.0258251
YACCPM6-1	4.38	4.18135	0.35	6.195	0.215405
YACCPM6-1-1	4.27	4.70231	0.38	6.5	0.215405
YACCPM6-1-2	4.35	4.66014	0.355	6.5	0.215405
YACCPM6-2	4.38	3.08243	0.245	5.49	0.134995
YACCPM6-2-1	4.38	2.92616	0.2	5.46	0.136756
YACCPM6-2-2	4.37	2.97851	0.255	5.395	0.136756
YACCPM6-3	4.38	2.19295	0.21	4.89	0.063389
YACCPM6-3-1	4.36	2.31775	0.26	4.995	0.0663237
YACCPM6-3-2	4.38	2.08796	0.2	5.005	0.0657367
YACCPM6-4	4.41	1.23858	0.195	4.75	0.0393247
YACCPM6-4-1	4.4	1.2805	0.205	4.905	0.0393247
YACCPM6-4-2	4.39	1.29055	0.205	4.79	0.0393247
YACCPM6-5	4.83	0.948569	0.16	2.86	0.0498895
YACCPM6-5-1	4.84	0.996792	0.12	2.89	0.0440201
YACCPM6-5-2	4.81	0.963112	0.155	2.855	0.0469548
YACCPM6-6	4.92	0.548161	0.11	1.93	0.179602
YACCPM6-6-1	4.87	0.568183	0.16	1.855	0.176667
YACCPM6-6-2	4.86	0.535063	0.135	1.935	0.176667
YACCPM7-1	4.39	3.16192	0.285	7.515	-0.130887
YACCPM7-1-1	4.36	3.41316	0.305	7.76	-0.126191
YACCPM7-1-2	4.34	3.38401	0.28	7.42	-0.126778
YACCPM7-2	4.11	2.28057	0.255	7.455	0.143212
YACCPM7-2-1	4.18	2.34479	0.22	7.53	0.139691
YACCPM7-2-2	4.19	2.32343	0.3	7.59	0.142625
YACCPM7-3	4.28	0.927622	0.15	8	0.27762
YACCPM7-3-1	4.34	0.926817	0.215	8.52	0.278207
YACCPM7-3-2	4.39	0.948991	0.2	8.685	0.278207
YACCPM7-4	4.95	0.595765	0.46	4.25	0.257665
YACCPM7-4-1	4.96	0.604517	0.365	4.02	0.257665
YACCPM7-4-2	4.99	0.57852	0.44	4.75	0.257665
YACCPM7-5	5.11	0.388419	0.155	5.75	0.19721
YACCPM7-5-1	5.14	0.373355	0.26	5.445	0.194276
YACCPM7-5-2	5.16	0.371976	0.235	6.075	0.19721
YACCPM7-6	5.51	0.343348	0.1	7.04	0.222448
YACCPM7-6-1	5.57	0.397303	0.14	7.055	0.222448
YACCPM7-6-2	5.67	0.294637	0.125	7.355	0.222448
YACCPM7-7	5.41	0.482311	0.235	8.105	0.261773
YACCPM7-7-1	5.43	0.500583	0.2	7.205	0.261773
YACCPM7-7-2	5.41	0.521837	0.19	8.005	0.261773
